# Supplementary material for: Does an increase in visits to general practice indicate a malignancy?
Source: Springer Nature journal article supplement (doi:10.1186/s12875-016-0477-0), 2016-07-25
Supplement: MOESM1 [file 10520904]

Does an increase in contact frequencies to general practice indicate a malignancy?

***Appendix A***

(Searching algorithm for matched controls' identification)

```

1  * This do-file finds controls (non-cancer patients) matching in gender and age
2  * to 3,310 cases (cancer patients) which were indexed as having
3  * at least one practice contact within the 6 quarters prior to the quarter of
4  * first cancer diagnosis (q0).
5  * The controls, matched 1:1, also have to fulfill the condition of having
6  * at least one practice contact within the 6 quarters prior to the quarter of
7  * first cancer diagnosis (q0) of their matched case.
8  *
9  *
10 * For do-file development, reset studypat and studpatfinal to starting condition
11 *
12 *use "D:\EigDatNotebook20130901\2 RoutinDatNutzg\ICI 2014\ICIEarlyCaDx\ICIEarlyCaDx
data\study data\studydata_v15\studypat_20150331_clone0.dta", clear
13 *save "D:\EigDatNotebook20130901\2 RoutinDatNutzg\ICI 2014\ICIEarlyCaDx\ICIEarlyCaDx
data\study data\studydata_v15\studypat_20150331_clone.dta", replace
14 *use "D:\EigDatNotebook20130901\2 RoutinDatNutzg\ICI 2014\ICIEarlyCaDx\ICIEarlyCaDx
data\study data\studydata_v15\studypatfinal\studypatfinal_20150331_clone0.dta", clear
15 *save "D:\EigDatNotebook20130901\2 RoutinDatNutzg\ICI 2014\ICIEarlyCaDx\ICIEarlyCaDx
data\study data\studydata_v15\studypatfinal\studypatfinal_20150331_clone.dta", replace
16 *
17 * Find nearest control to unmatched case, attribute case's q0 and id_pair540, and flag
both as provisionally matched
18 *
19 use "D:\EigDatNotebook20130901\2 RoutinDatNutzg\ICI 2014\ICIEarlyCaDx\ICIEarlyCaDx
data\study data\studydata_v15\studypat_20150331_clone.dta", clear
20 gsort id_sort
21 replace q0=q0[_n+1] if ( ( ind_chap2==0) & ( q0==0) & ( id_pair540==.) & (
ind_matchalready==0) & ( ind_chap2[_n+1]==1) & ( q0[_n+1]>0) & ( id_pair540[_n+1]>0) & (
id_pair540[_n+1]<.) & (ind_matchalready[_n+1]==0))
22 replace id_pair540=id_pair540[_n+1] if ( ( ind_chap2==0) & ( q0== q0[_n+1]) & ( id_pair540
==.) & ( ind_matchalready==0) & ( ind_chap2[_n+1]==1) & ( q0[_n+1]>0) & ( id_pair540[_n+1
]>0) & (id_pair540[_n+1]<.) & ( ind_matchalready[_n+1]==0))
23 replace ind_matchalready=1 if ( ( ind_chap2==0) & ( q0==q0[_n+1]) & ( id_pair540==
id_pair540[_n+1] ) & ( ind_matchalready==0) & ( ind_chap2[_n+1]==1) & ( q0[_n+1]>0) & (
id_pair540[_n+1]>0) & ( id_pair540[_n+1]<.) & ( ind_matchalready[_n+1]==0))
24 replace ind_matchalready=1 if ( ( ind_chap2==1) & ( q0==q0[_n-1]) & ( id_pair540==
id_pair540[_n-1] ) & ( ind_matchalready==0) & ( ind_chap2[_n-1]==0) & ( q0[_n-1]>0) & (
id_pair540[_n-1]>0) & ( ind_matchalready[_n-1]==1))
25 save "D:\EigDatNotebook20130901\2 RoutinDatNutzg\ICI 2014\ICIEarlyCaDx\ICIEarlyCaDx
data\study data\studydata_v15\studypat_20150331_clone.dta", replace
26 *
27 * Write / flag matches into studydata
28 *
29 use "D:\EigDatNotebook20130901\2 RoutinDatNutzg\ICI 2014\ICIEarlyCaDx\ICIEarlyCaDx
data\study data\studydata_v15\studydata_20150331_clone.dta", clear
30 merge m:1 id_patient using "D:\EigDatNotebook20130901\2 RoutinDatNutzg\ICI
2014\ICIEarlyCaDx\ICIEarlyCaDx data\study data\studydata_v15\studypat_20150331_clone.dta",
update replace
31 *
32 * Flag non-fitting control
33 *
34 replace ind_matchalready=-1 if ( ( ind_chap2==0) & (( q0>0) & ((( q_date-q0)<-6) | ((
q_date-q0)>-1))))
35 collapse (max) ind_matchalready, by ( id_patient)
36 save "D:\EigDatNotebook20130901\2 RoutinDatNutzg\ICI 2014\ICIEarlyCaDx\ICIEarlyCaDx
data\resulting data\20150331_backfire_clone.dta", replace
37 *
38 * Write back into list of studypat, save matched pairs found, delete non-fitting
controls, and include unmatched cases into search again
39 *
40 use "D:\EigDatNotebook20130901\2 RoutinDatNutzg\ICI 2014\ICIEarlyCaDx\ICIEarlyCaDx
data\study data\studydata_v15\studypat_20150331_clone.dta", clear
41 merge 1:1 id_patient using "D:\EigDatNotebook20130901\2 RoutinDatNutzg\ICI
2014\ICIEarlyCaDx\ICIEarlyCaDx data\resulting data\20150331_backfire_clone.dta", update
replace
42 drop _merge
43 gsort id_sort
44 replace ind_matchalready=0 if ( ( ind_chap2==1) & ( q0==q0[_n-1]) & ( id_pair540==
id_pair540[_n-1] ) & ( ind_matchalready==1) & ( ind_chap2[_n-1]==0) & ( ind_matchalready[
_n-1]==-1))
45 save "D:\EigDatNotebook20130901\2 RoutinDatNutzg\ICI 2014\ICIEarlyCaDx\ICIEarlyCaDx
data\study data\studydata_v15\studypat_20150331_clone.dta", replace
46 *
47 use "D:\EigDatNotebook20130901\2 RoutinDatNutzg\ICI 2014\ICIEarlyCaDx\ICIEarlyCaDx

```

```
data\study data\studydata_v15\studypat_20150331_clone.dta", clear
48 gsort id_sort
49 drop if ( ind_matchalready != 1)
50 gsort id_sort
51 append using "D:\EigDatNotebook20130901\2 RoutinDatNutzg\ICI
2014\ICIEarlyCaDx\ICIEarlyCaDx data\study
data\studydata_v15\studypatfinal\studypatfinal_20150331_clone.dta"
52 save "D:\EigDatNotebook20130901\2 RoutinDatNutzg\ICI 2014\ICIEarlyCaDx\ICIEarlyCaDx
data\study data\studydata_v15\studypatfinal\studypatfinal_20150331_clone.dta", replace
53 *
54 use "D:\EigDatNotebook20130901\2 RoutinDatNutzg\ICI 2014\ICIEarlyCaDx\ICIEarlyCaDx
data\study data\studydata_v15\studypat_20150331_clone.dta", clear
55 gsort id_sort
56 drop if ( ind_matchalready==1)
57 drop if ( ind_matchalready==1)
58 save "D:\EigDatNotebook20130901\2 RoutinDatNutzg\ICI 2014\ICIEarlyCaDx\ICIEarlyCaDx
data\study data\studydata_v15\studypat_20150331_clone.dta", replace
59 *
60 * End of do-file
61
62
```
